# Supplementary material for: Cellulosic Ethanol Production Using Waste Wheat Stillage after Microwave-Assisted Hydrotropic Pretreatment
Source: MDPI journal article supplement (doi:10.3390/molecules27186097), 2022-09-18
Supplement: s1 [file s1]

## Supplementary Material

Table S1. Statistical analysis of variance (ANOVA).

| Source              | DF | Adj SS | Adj MS | F-value | P-Value |
|---------------------|----|--------|--------|---------|---------|
| Model               | 26 | 4929.0 | 189.6  | 31.31   | <0.001* |
| Enzyme              | 2  | 3205.5 | 1602.8 | 264.69  | <0.001* |
| Biomass             | 2  | 195.7  | 97.9   | 16.16   | <0.001* |
| Time                | 2  | 1398.1 | 699.0  | 115.44  | <0.001* |
| Enzyme*Biomass      | 4  | 35.1   | 8.8    | 1.45    | 0.231   |
| Enzyme*Time         | 4  | 73.1   | 18.3   | 3.02    | 0.026*  |
| Biomass*Time        | 4  | 13.3   | 3.3    | 0.55    | 0.702   |
| Enzyme*Biomass*Time | 8  | 8.3    | 1.0    | 0.17    | 0.994   |
| Error               | 54 | 327.0  | 6.1    |         |         |

R-sq = 0.9378.

DF-Degree of freedom; Adj SS-Adjusted sum of squares; Adj MS-Adjusted mean squares; P-Value-Probability; F-Value-Test statistics; S-significant \*  $p < 0.05$ .
